# Supplementary material for: Genetic variation for maize root architecture in response to drought stress at the seedling stage
Source: PubMed Central journal article supplement — Breed Sci. 2015 Sep 1;65(4):298–307. doi: 10.1270/jsbbs.65.298 (PMC4542930; doi:10.1270/jsbbs.65.298), 2015-09-01
Supplement: 65_298_1.pdf [file 65_298_1.pdf]

Supplemental Table 1. Comprehensive drought resistance measurement value of maize inbred lines used in the study

| <b>ID</b> | <b>Genotype</b>        | <b>Origin</b> | <b>Heterotic groups</b> | <b>D</b> | <b>Group</b> |
|-----------|------------------------|---------------|-------------------------|----------|--------------|
| 1         | 178                    | China         | TST                     | 0.39     | 2            |
| 2         | 273                    | China         | NSS                     | 0.37     | 2            |
| 3         | 288                    | China         | NSS                     | 0.48     | 3            |
| 4         | 81565                  | China         | TST                     | 0.61     | 3            |
| 5         | 18-599 (red)           | China         | NSS                     | 0.44     | 3            |
| 6         | 18-599 (white)         | China         | NSS                     | 0.64     | 3            |
| 7         | 20V-18                 | China         | TST                     | 0.42     | 3            |
| 8         | 48-2                   | China         | NSS                     | 0.24     | 2            |
| 9         | 5003 <sup>b</sup>      | China         | TST                     | 0.11     | 1            |
| 10        | 622016-ZCN-2           | China         | NSS                     | 0.57     | 3            |
| 11        | 634-11511              | China         | NSS                     | 0.35     | 2            |
| 12        | 698-1                  | China         | NSS                     | 0.55     | 3            |
| 13        | A318                   | China         | TST                     | 0.40     | 3            |
| 14        | AS6103                 | USA           | TST                     | 0.33     | 2            |
| 15        | B73                    | USA           | SS                      | 0.60     | 3            |
| 16        | B97                    | USA           | NSS                     | 0.51     | 3            |
| 17        | Chang7-2               | China         | SS                      | 0.27     | 2            |
| 18        | Chuan 29 Female Parent | China         | TST                     | 0.42     | 3            |
| 19        | Cixibainuo             | China         | TST                     | 0.37     | 2            |
| 20        | CML133 <sup>b</sup>    | CIMMYT        | TST                     | 0.15     | 1            |
| 21        | CML192                 | CIMMYT        | TST                     | 0.26     | 2            |
| 22        | CML202                 | CIMMYT        | TST                     | 0.53     | 3            |
| 23        | CML206                 | CIMMYT        | TST                     | 0.31     | 2            |
| 24        | CML228                 | CIMMYT        | TST                     | 0.54     | 3            |
| 25        | CML247 <sup>a</sup>    | CIMMYT        | TST                     | 1.73     | 4            |
| 26        | CML277 <sup>a</sup>    | CIMMYT        | TST                     | 0.84     | 4            |
| 27        | CML312SR               | CIMMYT        | SS                      | 0.41     | 3            |
| 28        | CML330                 | CIMMYT        | TST                     | 0.25     | 2            |
| 29        | CML333                 | CIMMYT        | TST                     | 0.49     | 3            |
| 30        | CML411                 | CIMMYT        | TST                     | 0.34     | 2            |
| 31        | CML418                 | CIMMYT        | TST                     | 0.36     | 2            |
| 32        | CML479                 | CIMMYT        | TST                     | 0.36     | 2            |
| 33        | CML504                 | CIMMYT        | SS                      | 0.28     | 2            |
| 34        | CML505                 | CIMMYT        | SS                      | 0.36     | 2            |
| 35        | CML511                 | CIMMYT        | SS                      | 0.28     | 2            |
| 36        | CML52 <sup>a</sup>     | CIMMYT        | TST                     | 0.73     | 4            |
| 37        | CML69                  | CIMMYT        | TST                     | 0.61     | 3            |
| 38        | CML84                  | CIMMYT        | TST                     | 0.41     | 3            |

|    |                       |        |       |      |   |
|----|-----------------------|--------|-------|------|---|
| 39 | CML85                 | CIMMYT | TST   | 0.38 | 2 |
| 40 | CML96                 | CIMMYT | TST   | 0.31 | 2 |
| 41 | CML99                 | CIMMYT | TST   | 0.35 | 2 |
| 42 | CMT-L008              | CIMMYT | TST   | 0.43 | 3 |
| 43 | CMT-L094              | CIMMYT | NSS   | 0.32 | 2 |
| 44 | CMT-L107b             | CIMMYT | NSS   | 0.22 | 2 |
| 45 | CMT-L113              | CIMMYT | NSS   | 0.46 | 3 |
| 46 | CMT-L153              | CIMMYT | TST   | 0.26 | 2 |
| 47 | CMT-L189              | CIMMYT | TST   | 0.59 | 3 |
| 48 | CMT-L197              | CIMMYT | TST   | 0.62 | 3 |
| 49 | CMT-L217 <sup>a</sup> | CIMMYT | TST   | 0.97 | 4 |
| 50 | CMT-L223              | CIMMYT | TST   | 0.47 | 3 |
| 51 | Dan598                | China  | NSS   | 0.21 | 2 |
| 52 | ES40                  | China  | SS    | 0.24 | 2 |
| 53 | F42                   | USA    | TST   | 0.39 | 2 |
| 54 | FAPW                  | USA    | TST   | 0.51 | 3 |
| 55 | FR19 <sup>a</sup>     | USA    | TST   | 0.73 | 4 |
| 56 | H-16                  | CIMMYT | TST   | 0.28 | 2 |
| 57 | Han21                 | China  | NSS   | 0.22 | 2 |
| 58 | HP301                 | USA    | mixed | 0.39 | 2 |
| 59 | Il14H <sup>a</sup>    | USA    | mixed | 0.73 | 4 |
| 60 | Ji853 <sup>b</sup>    | China  | NSS   | 0.14 | 1 |
| 61 | Jiao51                | China  | TST   | 0.44 | 3 |
| 62 | Ki11 <sup>a</sup>     | USA    | TST   | 0.79 | 4 |
| 63 | Ki3                   | USA    | TST   | 0.63 | 3 |
| 64 | Ky21                  | USA    | NSS   | 0.41 | 3 |
| 65 | LH132                 | USA    | TST   | 0.21 | 2 |
| 66 | LH51                  | USA    | TST   | 0.21 | 2 |
| 67 | LX9801                | China  | SS    | 0.42 | 3 |
| 68 | M162W                 | USA    | NSS   | 0.38 | 2 |
| 69 | M37W                  | USA    | mixed | 0.67 | 3 |
| 70 | Mo17 <sup>a</sup>     | USA    | SS    | 0.76 | 4 |
| 71 | Mo18W                 | USA    | mixed | 0.49 | 3 |
| 72 | Ms71                  | USA    | NSS   | 0.53 | 3 |
| 73 | MS71                  | USA    | NSS   | 0.21 | 2 |
| 74 | Nan21-3               | China  | SS    | 0.47 | 3 |
| 75 | NC350                 | USA    | TST   | 0.61 | 3 |
| 76 | NC358                 | USA    | TST   | 0.61 | 3 |
| 77 | NK764                 | USA    | TST   | 0.27 | 2 |
| 78 | NS701                 | USA    | TST   | 0.26 | 2 |
| 79 | Oh43                  | USA    | NSS   | 0.42 | 3 |
| 80 | Oh7B                  | USA    | NSS   | 0.42 | 3 |
| 81 | P1                    | CIMMYT | TST   | 0.35 | 2 |

|     |                                  |         |       |      |   |
|-----|----------------------------------|---------|-------|------|---|
| 82  | P39                              | USA     | mixed | 0.51 | 3 |
| 83  | PHG83                            | USA     | TST   | 0.34 | 2 |
| 84  | PHN47 <sup>b</sup>               | USA     | TST   | 0.14 | 1 |
| 85  | Qi319 <sup>b</sup>               | China   | NSS   | 0.15 | 1 |
| 86  | R08                              | China   | NSS   | 0.47 | 3 |
| 87  | R09 <sup>b</sup>                 | China   | NSS   | 0.18 | 1 |
| 88  | RP125                            | China   | SS    | 0.48 | 3 |
| 89  | SAML1001 <sup>a</sup>            | China   | TST   | 0.94 | 4 |
| 90  | Si287                            | China   | SS    | 0.27 | 2 |
| 91  | Silunuo                          | China   | SS    | 0.44 | 3 |
| 92  | Teosinte ( <i>ssp.mexicana</i> ) | CIMMYT  | TST   | 0.28 | 2 |
| 93  | Tie7922                          | China   | SS    | 0.40 | 3 |
| 94  | Tx303                            | USA     | mixed | 0.69 | 3 |
| 95  | Tzi 8                            | Nigeria | TST   | 0.62 | 3 |
| 96  | VL054178                         | CIMMYT  | SS    | 0.50 | 3 |
| 97  | VL05610                          | CIMMYT  | TST   | 0.30 | 2 |
| 98  | VL056883                         | CIMMYT  | TST   | 0.31 | 2 |
| 99  | VL062784                         | CIMMYT  | NSS   | 0.43 | 3 |
| 100 | W8304                            | USA     | TST   | 0.22 | 2 |
| 101 | Ye478                            | China   | SS    | 0.33 | 2 |
| 102 | Zheng22 <sup>b</sup>             | China   | SS    | 0.19 | 1 |
| 103 | Zheng58                          | China   | TST   | 0.41 | 3 |

<sup>a</sup> and <sup>b</sup> indicate drought tolerance lines and drought sensitive lines screened based on comprehensive drought resistance measurement value (D value)
